# Supplementary material
Source: bioRxiv or medRxiv preprint supplement (https://medrxiv.org/content/medrxiv/early/2022/07/09/2022.07.07.22277366/DC2/embed/media-2.pdf)

*Acon Labs Flowflex*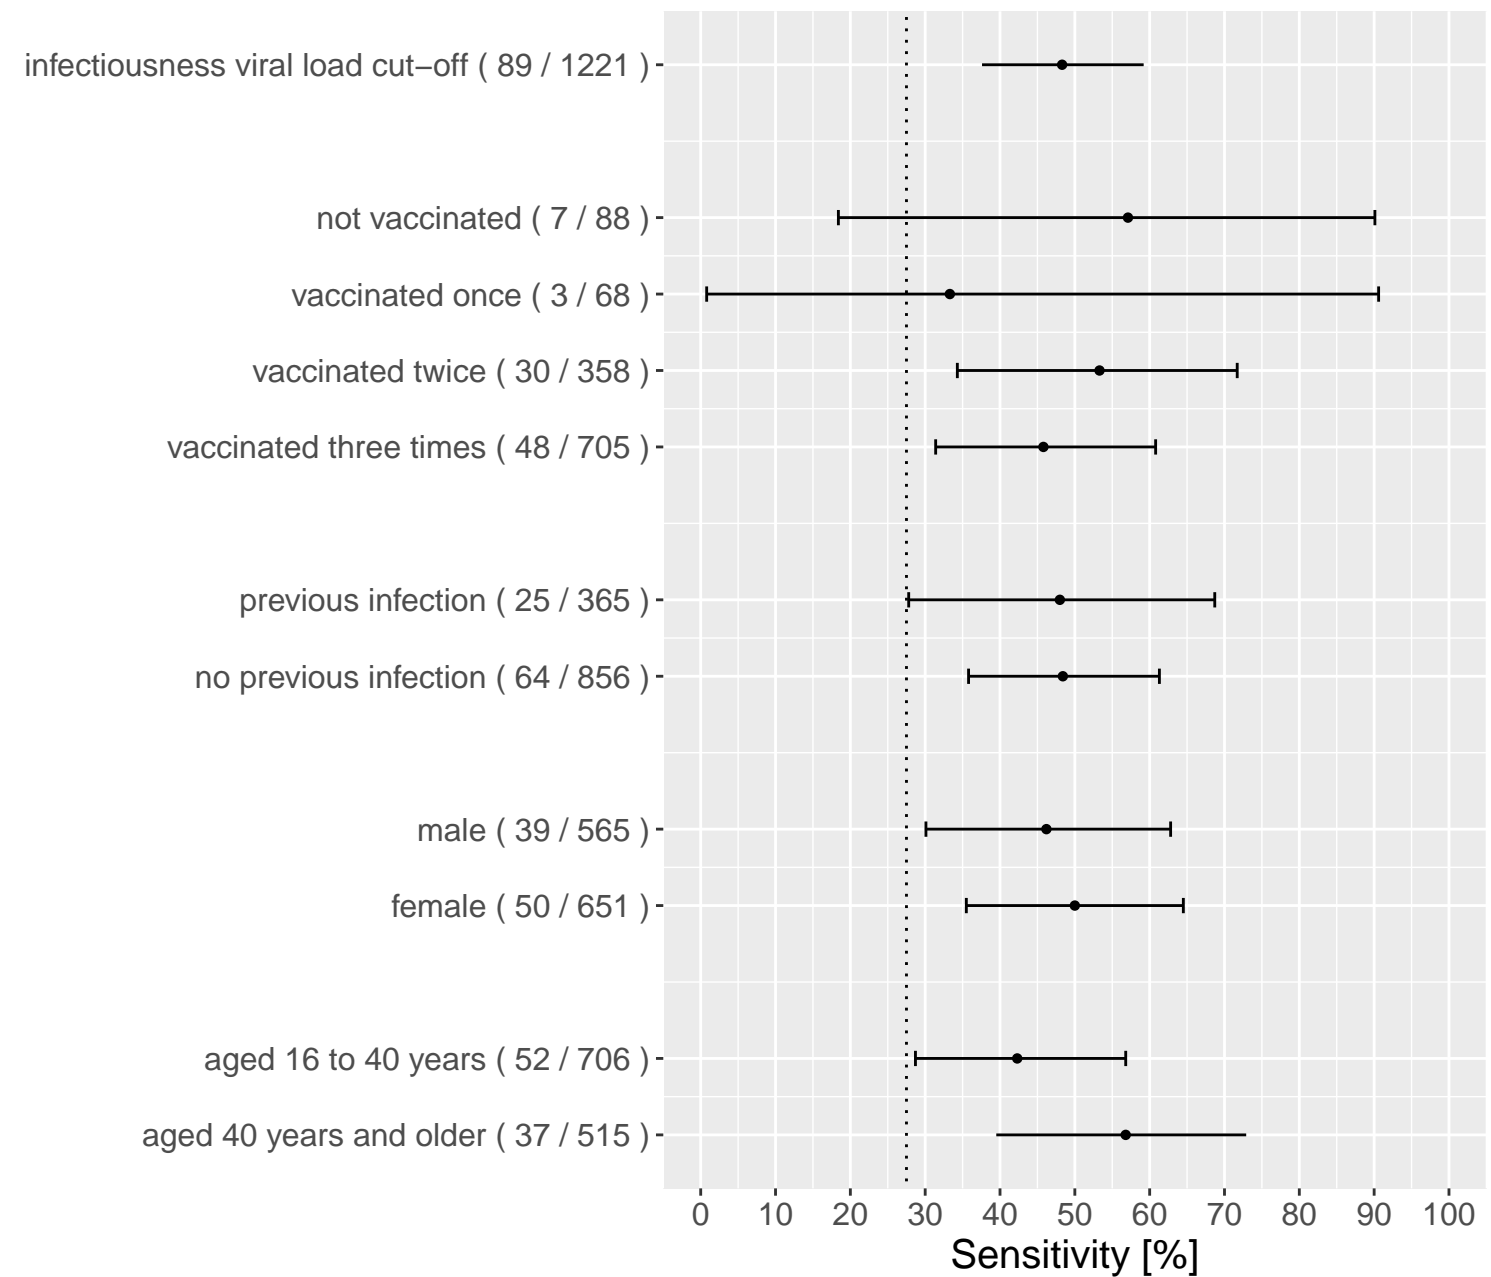*MP Biomedicals*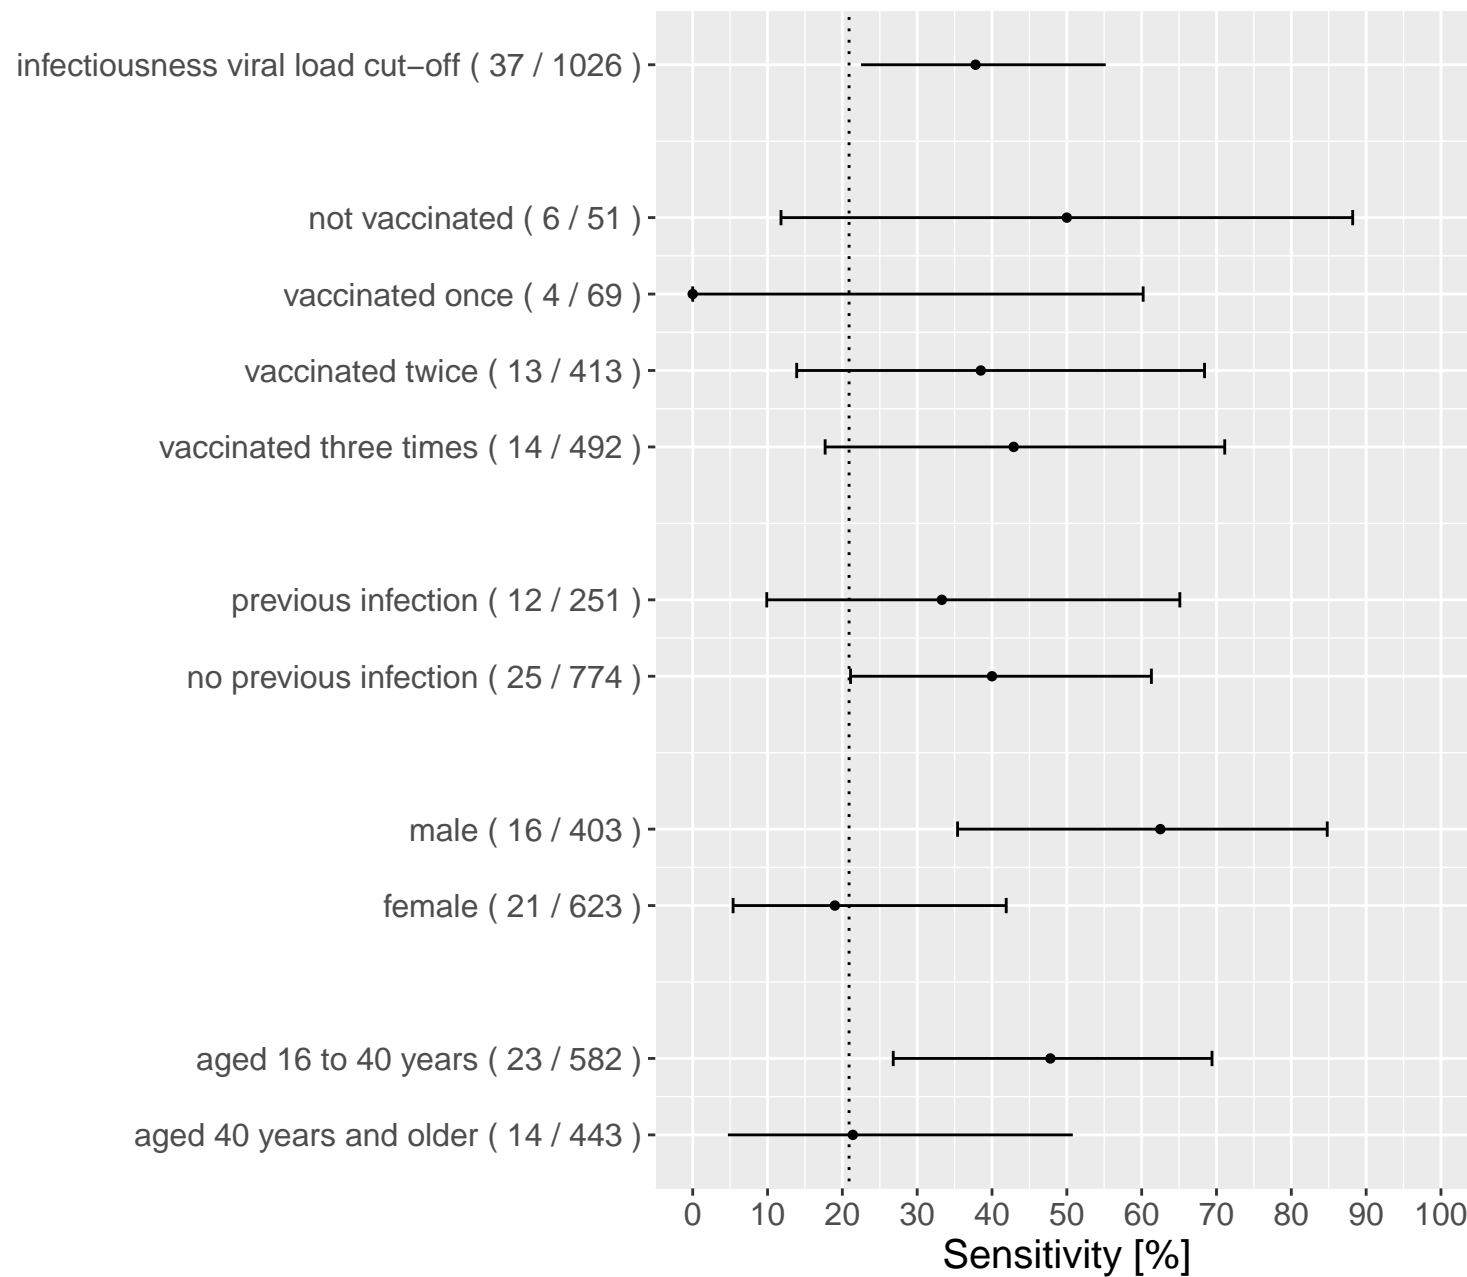*Siemens Healthineers*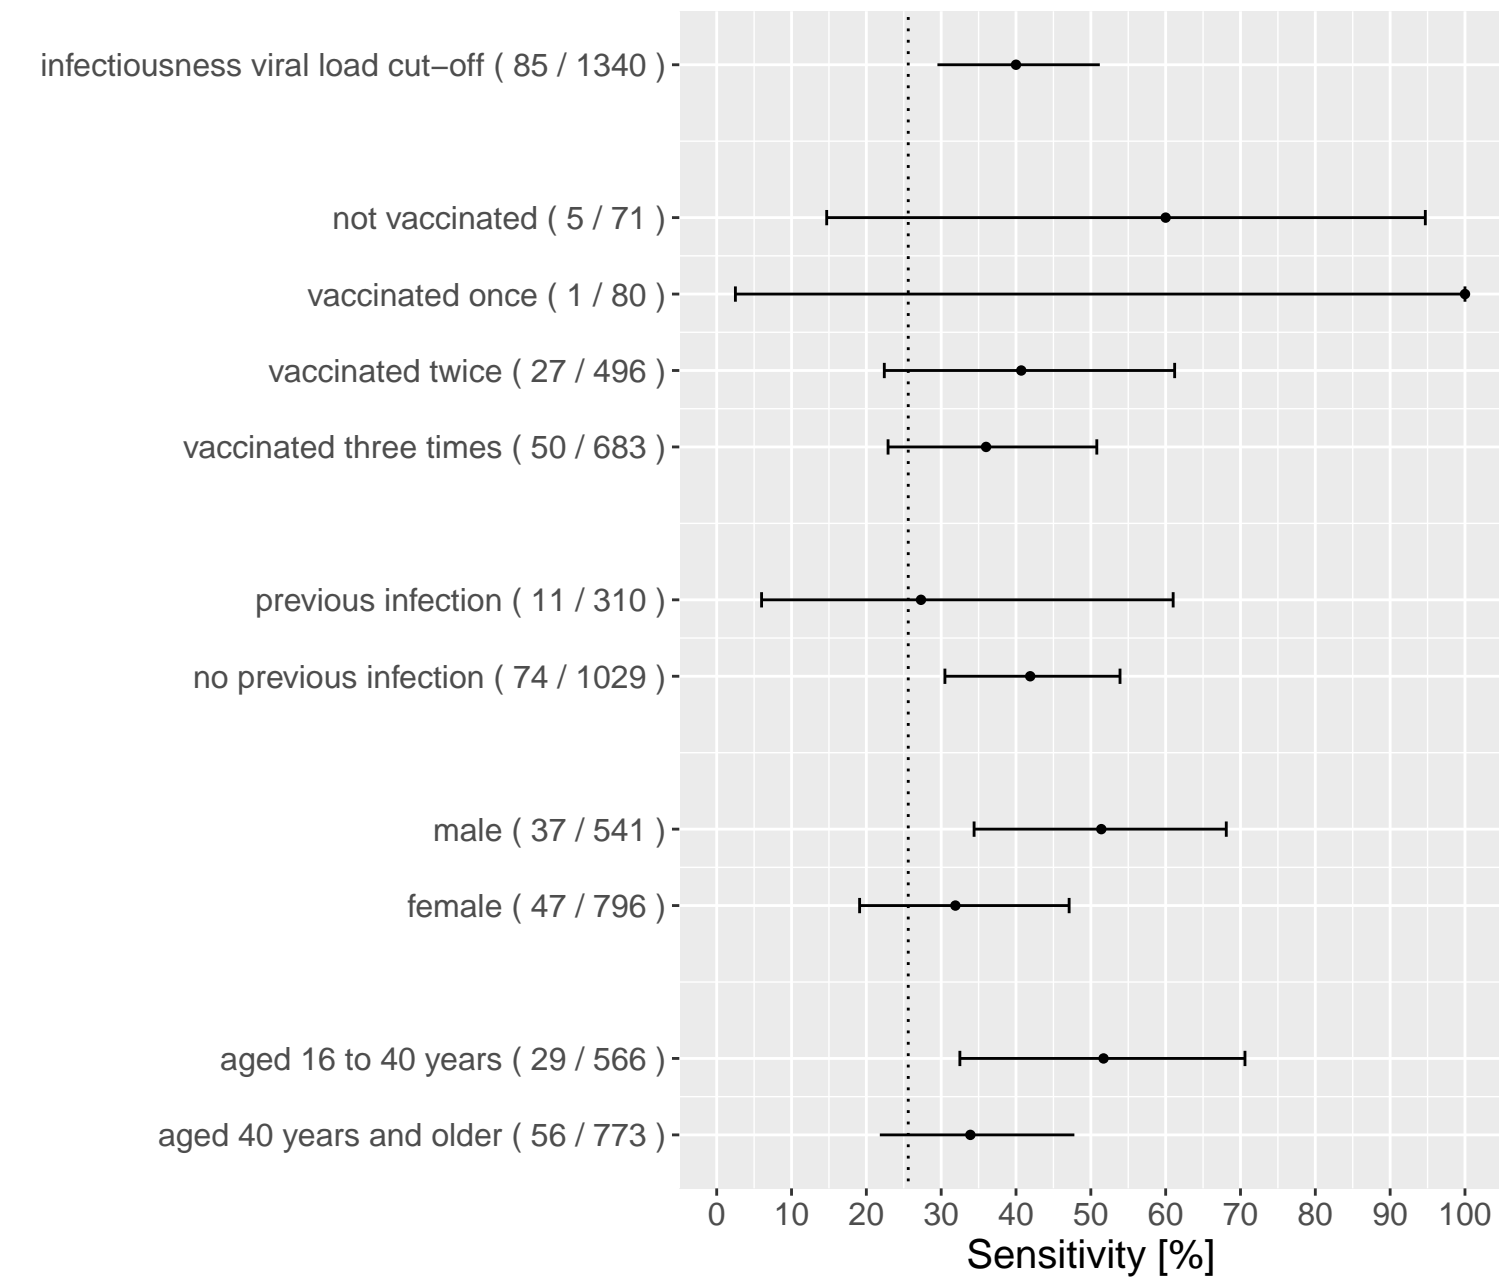

Supplement: Supplementary file [file media-2.pdf]
